# Supplementary material
Source: PubMed Central journal article supplement (PMC2753874)
Supplement: NIHMS121542-supplement-supplement_1.pdf [file NIHMS121542-supplement-supplement_1.pdf]

1  
2  
3 Figure legends supplementary figures  
4  
5  
6  
7

8 Figure S1: Deletion of Mcl-1 does not alter expression of other Bcl-2 family proteins.  
9  
10 Total liver lysates of Mcl-1<sup>flox/flox</sup>, Mcl-1<sup>flox/+</sup>-AlbCre and Mcl-1<sup>flox/flox</sup>-AlbCre mice at the  
11  
12 age of 8 weeks were analyzed by western blot for expression levels of Mcl-1, Bcl-x<sub>L</sub>,  
13  
14 Bid, Bax and Bak and for α-Tubulin as loading control.  
15  
16  
17

18  
19  
20 Figure S2. Mcl-1 deletion does not alter CCl<sub>4</sub> induced chronic liver damage. 8 week  
21  
22 old Mcl-1<sup>+/+</sup> and Mcl-1<sup>-/-</sup> mice were injected twice a week intraperitoneally with carbon  
23  
24 tetrachloride (CCl<sub>4</sub>; 100mg/kg, dissolved in olive oil) (+) or with olive oil as control (-).  
25  
26 After 5 weeks, mice were starved overnight, and sacrificed. (A) Blood was collected  
27  
28 and serum AST and ALT levels were determined. (B) mRNA from total liver lysates  
29  
30 was isolated and transcribed into cDNA. Collagen-1 and GAPDH expression were  
31  
32 analyzed by RealTime-PCR, and collagen/GAPDH ratio was calculated. Both single  
33  
34 (squares) and median values (bars) are presented. (C) Liver sections were stained  
35  
36 with Sirius red for collagen deposition. The bar corresponds to 200μm. \*: p<0.05;  
37  
38  
39  
40  
41 n.s.: not significant.  
42  
43  
44  
45  
46  
47  
48  
49  
50  
51  
52  
53  
54  
55  
56  
57  
58  
59  
60

1  
2  
3  
4  
5  
6  
7  
8  
9  
10  
11  
12  
13  
14  
15  
16  
17  
18  
19  
20  
21  
22  
23  
24  
25  
26  
27  
28  
29  
30  
31  
32  
33  
34  
35  
36  
37  
38  
39  
40  
41  
42  
43  
44  
45  
46  
47  
48  
49  
50  
51  
52  
53  
54  
55  
56  
57  
58  
59  
60

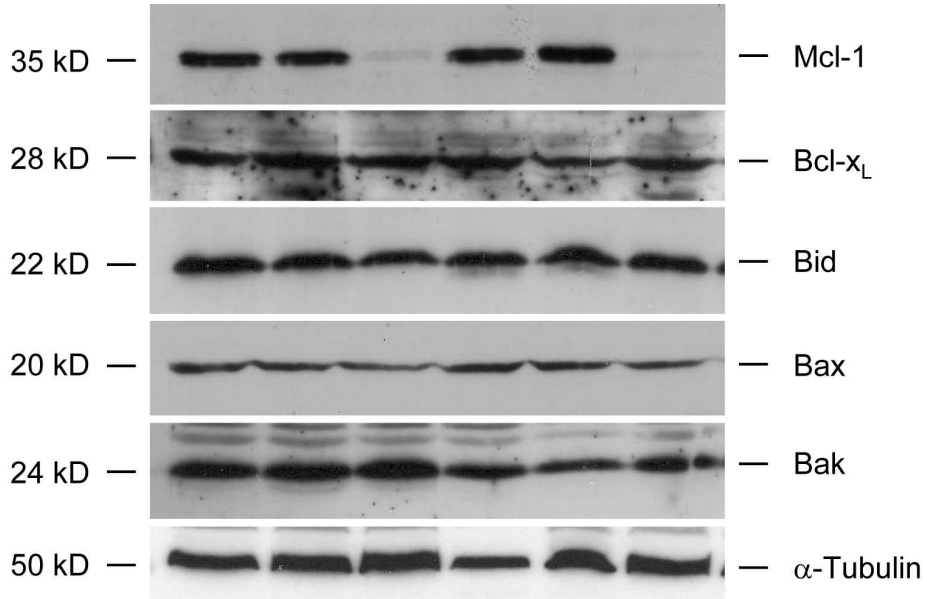

|        |    |    |    |    |    |    |
|--------|----|----|----|----|----|----|
| Mcl-1  | ff | f+ | ff | ff | f+ | ff |
| AlbCre | -  | +  | +  | -  | +  | +  |

Deletion of Mcl-1 does not alter expression of other Bcl-2 family proteins. Total liver lysates of Mcl 1flox/flox, Mcl 1flox/+ AlbCre and Mcl 1flox/flox AlbCre mice at the age of 8 weeks were analyzed by western blot for expression levels of Mcl 1, Bcl xL, Bid, Bax and Bak and for alpha-Tubulin as loading control.

139x100mm (300 x 300 DPI)

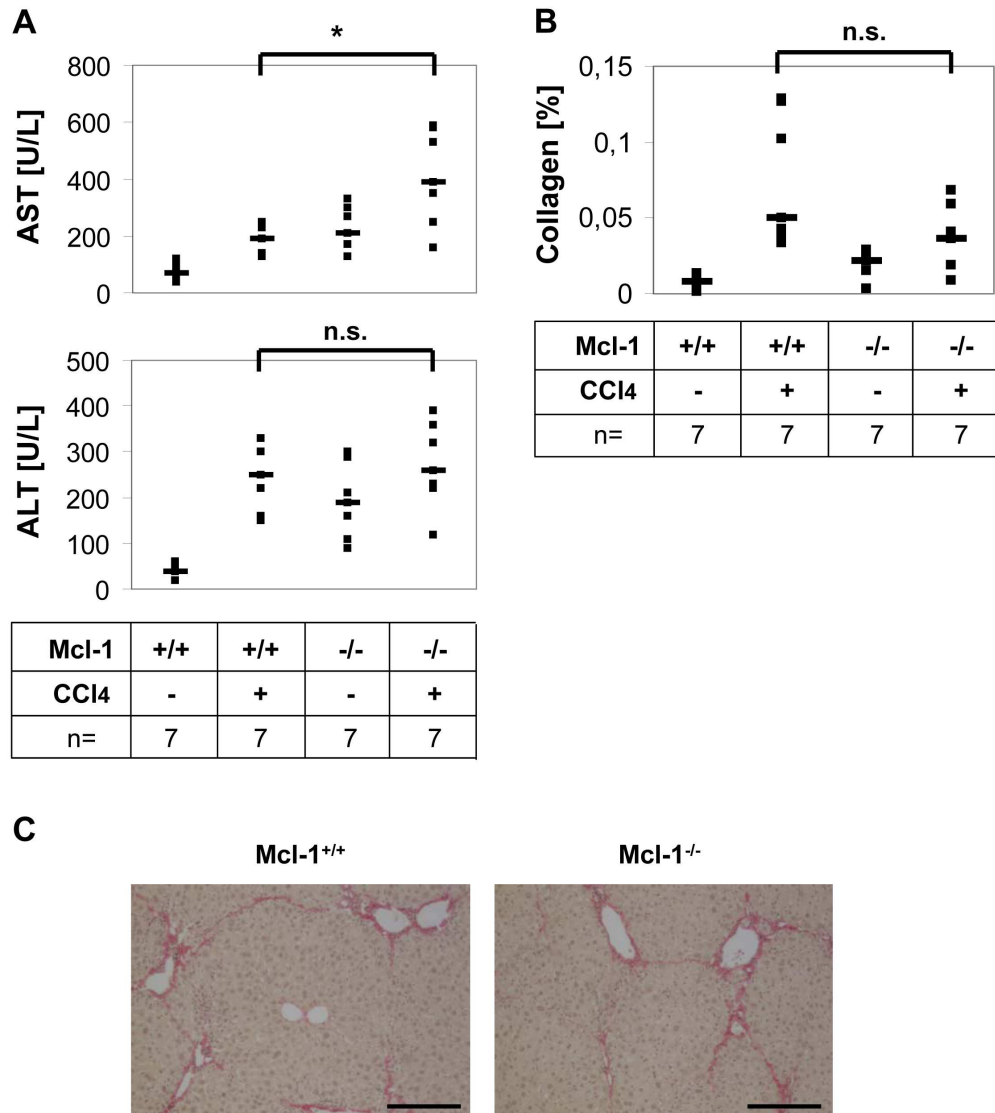

Mcl-1 deletion does not alter CCl<sub>4</sub> induced chronic liver damage. 8 week old Mcl 1<sup>+/+</sup> and Mcl 1<sup>-/-</sup> mice were injected twice a week intraperitoneally with carbon tetrachloride (CCl<sub>4</sub>; 100mg/kg, dissolved in olive oil) (+) or with olive oil as control (-). After 5 weeks, mice were starved overnight, and sacrificed. (A) Blood was collected and serum AST and ALT levels were determined. (B) mRNA from total liver lysates was isolated and transcribed into cDNA. Collagen-1 and GAPDH expression were analyzed by RealTime-PCR, and collagen/GAPDH ratio was calculated. Both single (squares) and median values (bars) are presented. (C) Liver sections were stained with Sirius red for collagen deposition. The bar corresponds to 200µm. \*: p<0.05; n.s.: not significant.  
190x213mm (300 x 300 DPI)
